# Supplementary material for: Identification of a novel immune signature for optimizing prognosis and treatment prediction in colorectal cancer
Source: publisher site journal article supplement (doi:10.18632/aging.203771), 2021-12-13
Supplement: Supplementary file [file aging-v13i23-203771-supplementary-material-SD3.pdf]

**SUPPLEMENTARY TABLES**

**Supplementary Table 2. Eight PRIRGs filtered out by lasso regression.**

| <b>IRGs</b> | <b>Coefficient</b> |
|-------------|--------------------|
| FABP4       | 0.0813685612698171 |
| AMH         | 0.131513420971701  |
| GRP         | 0.146281413219288  |
| INHBB       | 0.160968056160568  |
| NRG1        | -0.582958093399237 |
| UCN         | 0.213129186143968  |
| MC1R        | 0.335915826080654  |
| PTH1R       | 0.363374360149091  |

**Supplementary Table 3. Overall information of seven IRGs in the signature.**

| <b>Ensembl ID</b> | <b>IRGs</b> | <b>Coefficient</b> | <b>HR (95% CI)</b>  | <b>P-value</b> |
|-------------------|-------------|--------------------|---------------------|----------------|
| ENSG00000170323   | FABP4       | 0.139              | 1.15 (1.021-1.294)  | 0.021          |
| ENSG00000104899   | AMH         | 0.176              | 1.193 (0.962-1.479) | 0.109          |
| ENSG00000134443   | GRP         | 0.207              | 1.229 (1.014-1.491) | 0.036          |
| ENSG00000163083   | INHBB       | 0.211              | 1.235 (1.064-1.433) | 0.006          |
| ENSG00000157168   | NRG1        | -0.691             | 0.501 (0.216-1.164) | 0.108          |
| ENSG00000163794   | UCN         | 0.274              | 1.315 (0.929-1.863) | 0.122          |
| ENSG00000258839   | MC1R        | 0.366              | 1.442 (0.952-2.183) | 0.084          |

**Supplementary Table 4. Clinical characteristics of the TCGA cohort and the GSE39582 cohort.**

| TCGA cohort                    |               |                |                   | GSE39582 cohort       |               |                |                   |
|--------------------------------|---------------|----------------|-------------------|-----------------------|---------------|----------------|-------------------|
| Variable                       | Low (n = 208) | High (n = 229) | Overall (n = 437) | Variable              | Low (n = 220) | High (n = 222) | Overall (n = 442) |
| <b>Gender</b>                  |               |                |                   | <b>Gender</b>         |               |                |                   |
| Male                           | 113 (54.3%)   | 119 (52.0%)    | 232 (53.1%)       | Male                  | 122 (55.5%)   | 117 (52.7%)    | 239 (54.1%)       |
| Female                         | 95 (45.7%)    | 110 (48.0%)    | 205 (46.9%)       | Female                | 98 (44.5%)    | 105 (47.3%)    | 203 (45.9%)       |
| <b>Race</b>                    |               |                |                   | <b>Age</b>            |               |                |                   |
| White                          | 107 (51.4%)   | 124 (54.1%)    | 231 (52.9%)       | >= 65                 | 135 (61.4%)   | 147 (66.2%)    | 282 (63.8%)       |
| Black or african american      | 25 (12.0%)    | 30 (13.1%)     | 55 (12.6%)        | <65                   | 85 (38.6%)    | 75 (33.8%)     | 160 (36.2%)       |
| Others                         | 76 (36.5%)    | 75 (32.8%)     | 151 (34.6%)       | <b>Tumor location</b> |               |                |                   |
| <b>Age</b>                     |               |                |                   | Proximal              | 83 (37.7%)    | 96 (43.2%)     | 179 (40.5%)       |
| >= 65                          | 107 (51.4%)   | 139 (60.7%)    | 246 (56.3%)       | Distal                | 137 (62.3%)   | 126 (56.8%)    | 263 (59.5%)       |
| <65                            | 101 (48.6%)   | 90 (39.3%)     | 191 (43.7%)       | <b>Tumor stage</b>    |               |                |                   |
| <b>History of colon polyps</b> |               |                |                   | I                     | 14 (6.4%)     | 14 (6.3%)      | 28 (6.3%)         |
| No                             | 133 (63.9%)   | 134 (58.5%)    | 267 (61.1%)       | II                    | 113 (51.4%)   | 104 (46.8%)    | 217 (49.1%)       |
| Yes                            | 48 (23.1%)    | 54 (23.6%)     | 102 (23.3%)       | III                   | 73 (33.2%)    | 76 (34.2%)     | 149 (33.7%)       |
| NA                             | 27 (13.0%)    | 41 (17.9%)     | 68 (15.6%)        | IV                    | 20 (9.1%)     | 28 (12.6%)     | 48 (10.9%)        |
| <b>Tumor site</b>              |               |                |                   | <b>MMR status</b>     |               |                |                   |
| Left                           | 130 (62.5%)   | 117 (51.1%)    | 247 (56.5%)       | pMMR                  | 168 (76.4%)   | 168 (75.7%)    | 336 (76.0%)       |
| Right                          | 78 (37.5%)    | 112 (48.9%)    | 190 (43.5%)       | dMMR                  | 34 (15.5%)    | 27 (12.2%)     | 61 (13.8%)        |
| <b>Tumor stage</b>             |               |                |                   | NA                    | 18 (8.2%)     | 27 (12.2%)     | 45 (10.2%)        |
| I                              | 48 (23.1%)    | 29 (12.7%)     | 77 (17.6%)        | <b>TP53 mutation</b>  |               |                |                   |
| II                             | 79 (38.0%)    | 79 (34.5%)     | 158 (36.2%)       | Mutant                | 68 (30.9%)    | 70 (31.5%)     | 138 (31.2%)       |
| III                            | 59 (28.4%)    | 73 (31.9%)     | 132 (30.2%)       | Wildtype              | 69 (31.4%)    | 55 (24.8%)     | 124 (28.1%)       |
| IV                             | 22 (10.6%)    | 48 (21.0%)     | 70 (16.0%)        | NA                    | 83 (37.7%)    | 97 (43.7%)     | 180 (40.7%)       |
| <b>MSI status</b>              |               |                |                   | <b>KRAS mutation</b>  |               |                |                   |
| MSI-H                          | 33 (15.9%)    | 24 (10.5%)     | 57 (13.0%)        | Mutant                | 86 (39.1%)    | 90 (40.5%)     | 176 (39.8%)       |
| MSI-L                          | 31 (14.9%)    | 42 (18.3%)     | 73 (16.7%)        | Wildtype              | 134 (60.9%)   | 132 (59.5%)    | 266 (60.2%)       |
| MSS                            | 144 (69.2%)   | 163 (71.2%)    | 307 (70.3%)       | <b>BRAF mutation</b>  |               |                |                   |
| <b>MMR status</b>              |               |                |                   | Mutant                | 19 (8.6%)     | 23 (10.4%)     | 42 (9.5%)         |
| pMMR                           | 133 (63.9%)   | 140 (61.1%)    | 273 (62.5%)       | Wildtype              | 201 (91.4%)   | 199 (89.6%)    | 400 (90.5%)       |
| dMMR                           | 25 (12.0%)    | 29 (12.7%)     | 54 (12.4%)        | <b>CIMP</b>           |               |                |                   |
| NA                             | 50 (24.0%)    | 60 (26.2%)     | 110 (25.2%)       | Negative              | 176 (80.0%)   | 188 (84.7%)    | 364 (82.4%)       |
| <b>TP53 mutation</b>           |               |                |                   | Positive              | 44 (20.0%)    | 34 (15.3%)     | 78 (17.6%)        |
| Mutant                         | 126 (60.6%)   | 143 (62.4%)    | 269 (61.6%)       | <b>CIN</b>            |               |                |                   |
| Wildtype                       | 82 (39.4%)    | 86 (37.6%)     | 168 (38.4%)       | Negative              | 57 (25.9%)    | 45 (20.3%)     | 102 (23.1%)       |
| <b>KRAS mutation</b>           |               |                |                   | Positive              | 163 (74.1%)   | 177 (79.7%)    | 340 (76.9%)       |
| Mutant                         | 82 (39.4%)    | 110 (48.0%)    | 192 (43.9%)       |                       |               |                |                   |
| Wildtype                       | 126 (60.6%)   | 119 (52.0%)    | 245 (56.1%)       |                       |               |                |                   |
| <b>BRAF mutation</b>           |               |                |                   |                       |               |                |                   |
| Mutant                         | 24 (11.5%)    | 25 (10.9%)     | 49 (11.2%)        |                       |               |                |                   |
| Wildtype                       | 184 (88.5%)   | 204 (89.1%)    | 388 (88.8%)       |                       |               |                |                   |
| <b>EGFR mutation</b>           |               |                |                   |                       |               |                |                   |
| Mutant                         | 1 (0.5%)      | 8 (3.5%)       | 9 (2.1%)          |                       |               |                |                   |
| Wildtype                       | 207 (99.5%)   | 221 (96.5%)    | 428 (97.9%)       |                       |               |                |                   |
| <b>NRAS mutation</b>           |               |                |                   |                       |               |                |                   |
| Mutant                         | 8 (3.8%)      | 18 (7.9%)      | 26 (5.9%)         |                       |               |                |                   |
| Wildtype                       | 200 (96.2%)   | 211 (92.1%)    | 411 (94.1%)       |                       |               |                |                   |
| <b>APC mutation</b>            |               |                |                   |                       |               |                |                   |
| Mutant                         | 169 (81.2%)   | 177 (77.3%)    | 346 (79.2%)       |                       |               |                |                   |
| Wildtype                       | 39 (18.8%)    | 52 (22.7%)     | 91 (20.8%)        |                       |               |                |                   |
