# Supplementary material for: Identification of a novel immune signature for optimizing prognosis and treatment prediction in colorectal cancer
Source: publisher site journal article supplement (doi:10.18632/aging.203771), 2021-12-13
Supplement: Supplementary file [file aging-v13i23-203771-supplementary-material-SD6.pdf]

**Supplementary Table 7. List of potential therapeutic agents for CRC patients with IRGs signature high-risk score.**

| <b>Name</b>        | <b>Source</b> | <b>MOA</b>                        | <b>Target</b>                    | <b>Evidence for CRC treatment</b> |
|--------------------|---------------|-----------------------------------|----------------------------------|-----------------------------------|
| AT7867             | CTRP          | Akt inhibitors                    | Akt                              | PMID: 28081222                    |
| AZD4547            | CTRP          | FGFR inhibitors                   | FGFR                             | PMID: 25691251                    |
| BRD-K16147474      | CTRP          | NA                                | NA                               | NA                                |
| cytochalasin B     | CTRP          | excitatory proteins inhibitors    | cytoskeleton/endocytosis         | PMID: 16287074                    |
| PLX-4032           | CTRP          | B-raf <sup>V600E</sup> inhibitors | B-raf                            | PMID: 29326440                    |
| SGX-523            | CTRP          | Met kinase inhibitors             | c-Met                            | NA                                |
| PLX-4720           | CTRP          | B-raf <sup>V600E</sup> inhibitors | B-raf                            | PMID: 25381152/26351322           |
| TG-101348          | CTRP          | JAK2 inhibitors                   | JAK2/STAT3/PIM1 pathway          | PMID: 32346607                    |
| lovastatin         | CTRP          | HMG-CoA reductase inhibitors      | HMG-CoA reductase                | PMID: 24945998                    |
| BRD-K37390332      | CTRP          | NA                                | NA                               | NA                                |
| AMG458             | PRISM         | MET/RON inhibitors                | MET/RON                          | NA                                |
| LE135              | PRISM         | RAR $\beta$ antagonist            | RAR $\beta$                      | NA                                |
| mevastatin         | PRISM         | HMG-CoA reductase inhibitors      | HMG-CoA reductase                | PMID: 11408350                    |
| creatine           | PRISM         | NA                                | NA                               | NA                                |
| S-crizotinib       | PRISM         | ALK/RON/c-MET, MTH1 inhibitors    | ALK/RON/c-MET, MTH1              | PMID: 24695225/28320945           |
| colforsin daproate | PRISM         | adenylate cyclase agonist         | adenylate cyclase                | NA                                |
| erythritol         | PRISM         | NA                                | cytidylyltransferase             | NA                                |
| CHIR-98014         | PRISM         | GSK3 inhibitors                   | GSK-3 $\alpha$ and GSK-3 $\beta$ | NA                                |
| epinephrine        | PRISM         | adrenergic receptor agonist       | adrenergic receptor              | NA                                |
| tandutinib         | PRISM         | FLT3 inhibitors                   | Akt/mTOR pathway                 | PMID: 23427297                    |

MOA, mechanism of action.
