# Supplementary material for: Identification of a novel immune signature for optimizing prognosis and treatment prediction in colorectal cancer
Source: Aging (Albany NY). 2021 Dec 13;13(23):25518–49. doi: 10.18632/aging.203771 (PMC8714135; doi:10.18632/aging.203771)
Supplement: Supplementary Table 5 [file aging-13-203771-s004.xlsx]

## Sheet: Supplementary Table 5
Supplementary Table 5. Correlation analysis between the expression of seven IRGs and the infiltration of immune cells.
TCGA cohort					GSE39582 cohort
IRGs	immune cells	correlation	P-value		IRGs	immune cells	correlation	P-value
FABP4	aDC	0.137966	0.00066015		FABP4	aDC	0.0182175	0.666507
FABP4	B cells	0.219268	4.95054e-08		FABP4	B cells	0.245371	3.7627e-09
FABP4	CD8 T cells	0.196626	1.07138e-06		FABP4	CD8 T cells	0.207303	7.14232e-07
FABP4	Cytotoxic cells	0.211124	1.55628e-07		FABP4	Cytotoxic cells	0.259557	4.18722e-10
FABP4	DC	0.382397	1.54877e-22		FABP4	DC	0.408674	4.90891e-24
FABP4	Eosinophils	0.18085	7.47104e-06		FABP4	Eosinophils	0.266559	1.34786e-10
FABP4	iDC	0.435267	2.08824e-29		FABP4	iDC	0.539101	1.09283e-43
FABP4	Macrophages	0.461249	2.95582e-33		FABP4	Macrophages	0.506428	6.08943e-38
FABP4	Mast cells	0.395276	4.24804e-24		FABP4	Mast cells	0.526073	2.54074e-41
FABP4	Neutrophils	0.24213	1.55746e-09		FABP4	Neutrophils	0.255968	7.39122e-10
FABP4	NK CD56bright cells	-0.0705113	0.0828547		FABP4	NK CD56bright cells	-0.0570494	0.176845
FABP4	NK CD56dim cells	0.0307508	0.449883		FABP4	NK CD56dim cells	-0.0397595	0.34679
FABP4	NK cells	0.335103	2.27953e-17		FABP4	NK cells	0.192203	4.45016e-06
FABP4	pDC	0.284575	9.3962e-13		FABP4	pDC	0.101677	0.0158956
FABP4	T cells	0.232643	6.83821e-09		FABP4	T cells	0.257964	5.39421e-10
FABP4	T helper cells	0.0773303	0.0570974		FABP4	T helper cells	0.0364115	0.388933
FABP4	Tcm	0.11792	0.00364918		FABP4	Tcm	-0.0355964	0.399645
FABP4	Tem	0.270948	1.17318e-11		FABP4	Tem	0.179355	1.89309e-05
FABP4	TFH	0.297358	7.73745e-14		FABP4	TFH	0.176407	2.60248e-05
FABP4	Tgd	0.235165	4.64324e-09		FABP4	Tgd	0.423571	7.11667e-26
FABP4	Th1 cells	0.299847	4.68957e-14		FABP4	Th1 cells	0.334781	3.48268e-16
FABP4	Th17 cells	-0.180837	7.48316e-06		FABP4	Th17 cells	-0.13388	0.00146713
FABP4	Th2 cells	-0.0910643	0.0249764		FABP4	Th2 cells	-0.24922	2.10167e-09
FABP4	TReg	0.155219	0.000124834		FABP4	TReg	-0.116298	0.00577577
AMH	aDC	0.170538	2.4384e-05		AMH	aDC	0.0668508	0.113412
AMH	B cells	-0.0771357	0.0577273		AMH	B cells	-0.192142	4.48192e-06
AMH	CD8 T cells	0.0602486	0.138493		AMH	CD8 T cells	0.0421364	0.318703
AMH	Cytotoxic cells	0.210573	1.67897e-07		AMH	Cytotoxic cells	0.0538848	0.202131
AMH	DC	0.0812675	0.0455277		AMH	DC	0.0744794	0.0777036
AMH	Eosinophils	0.000614039	0.987965		AMH	Eosinophils	-0.122889	0.00352454
AMH	iDC	0.104634	0.00995053		AMH	iDC	-0.0895392	0.0338207
AMH	Macrophages	-0.005731	0.888036		AMH	Macrophages	-0.0300444	0.477193
AMH	Mast cells	-0.011454	0.77841		AMH	Mast cells	-0.180019	1.76084e-05
AMH	Neutrophils	-0.0136658	0.737072		AMH	Neutrophils	-0.0251229	0.552282
AMH	NK CD56bright cells	0.237225	3.37295e-09		AMH	NK CD56bright cells	0.323713	3.54871e-15
AMH	NK CD56dim cells	-0.0689206	0.0900494		AMH	NK CD56dim cells	0.0622629	0.140433
AMH	NK cells	0.0707559	0.0817909		AMH	NK cells	0.16714	6.84698e-05
AMH	pDC	0.032238	0.428261		AMH	pDC	0.0324799	0.442205
AMH	T cells	0.15604	0.000114798		AMH	T cells	-0.0404632	0.338315
AMH	T helper cells	-0.185812	4.12754e-06		AMH	T helper cells	-0.200262	1.7055e-06
AMH	Tcm	-0.169221	2.82208e-05		AMH	Tcm	-0.209132	5.6688e-07
AMH	Tem	-0.0187891	0.644356		AMH	Tem	-0.0821327	0.0516505
AMH	TFH	0.020955	0.606664		AMH	TFH	-0.0898385	0.0332274
AMH	Tgd	-0.16277	5.68473e-05		AMH	Tgd	-0.0916348	0.0298498
AMH	Th1 cells	0.107598	0.0080257		AMH	Th1 cells	0.0287084	0.497011
AMH	Th17 cells	0.0793382	0.050924		AMH	Th17 cells	0.0518948	0.219321
AMH	Th2 cells	0.0156066	0.701409		AMH	Th2 cells	0.0520237	0.218177
AMH	TReg	0.130233	0.0013134		AMH	TReg	0.228485	4.32243e-08
GRP	aDC	-0.0899402	0.0268301		GRP	aDC	-0.0429375	0.309581
GRP	B cells	-0.0555046	0.172381		GRP	B cells	-0.0447068	0.290049
GRP	CD8 T cells	0.00159229	0.968797		GRP	CD8 T cells	-0.0395689	0.349109
GRP	Cytotoxic cells	-0.081685	0.0444255		GRP	Cytotoxic cells	0.00505429	0.904837
GRP	DC	0.0208267	0.608869		GRP	DC	0.11912	0.00468826
GRP	Eosinophils	0.109791	0.00682355		GRP	Eosinophils	0.159852	0.000141465
GRP	iDC	0.249002	5.12596e-10		GRP	iDC	0.340569	9.95678e-17
GRP	Macrophages	0.300298	4.27974e-14		GRP	Macrophages	0.330704	8.28081e-16
GRP	Mast cells	0.284062	1.03595e-12		GRP	Mast cells	0.284262	6.60215e-12
GRP	Neutrophils	-0.0501498	0.217662		GRP	Neutrophils	0.0400138	0.343713
GRP	NK CD56bright cells	-0.132163	0.00110993		GRP	NK CD56bright cells	-0.017052	0.686674
GRP	NK CD56dim cells	-0.0156613	0.700414		GRP	NK CD56dim cells	-0.00371804	0.92992
GRP	NK cells	0.414208	1.59991e-26		GRP	NK cells	0.258294	5.11938e-10
GRP	pDC	0.156439	0.000110202		GRP	pDC	0.0540224	0.200979
GRP	T cells	-0.0283927	0.4854		GRP	T cells	0.0487462	0.248617
GRP	T helper cells	-0.067755	0.0956338		GRP	T helper cells	-0.174315	3.25198e-05
GRP	Tcm	-0.0171624	0.673283		GRP	Tcm	-0.0441206	0.296427
GRP	Tem	0.110594	0.0064255		GRP	Tem	0.12093	0.00409181
GRP	TFH	0.034083	0.402292		GRP	TFH	0.0439536	0.298261
GRP	Tgd	0.171535	2.18131e-05		GRP	Tgd	0.193911	3.64363e-06
GRP	Th1 cells	0.0876255	0.0310229		GRP	Th1 cells	0.194981	3.21151e-06
GRP	Th17 cells	-0.317337	1.2086e-15		GRP	Th17 cells	-0.16167	0.00011838
GRP	Th2 cells	-0.235065	4.71514e-09		GRP	Th2 cells	-0.327354	1.67082e-15
GRP	TReg	0.122562	0.00250861		GRP	TReg	0.00685969	0.871102
INHBB	aDC	-0.111426	0.00603516		INHBB	aDC	-0.08089	0.0553023
INHBB	B cells	-0.0793574	0.0508679		INHBB	B cells	-0.0954447	0.0236484
INHBB	CD8 T cells	0.10441	0.0101116		INHBB	CD8 T cells	0.055058	0.192466
INHBB	Cytotoxic cells	-0.0683686	0.0926603		INHBB	Cytotoxic cells	-0.021724	0.607312
INHBB	DC	-0.0119405	0.76926		INHBB	DC	0.131223	0.00182449
INHBB	Eosinophils	0.0189857	0.640894		INHBB	Eosinophils	0.048664	0.249416
INHBB	iDC	-0.0712414	0.0797118		INHBB	iDC	0.0686881	0.103811
INHBB	Macrophages	0.00067149	0.986839		INHBB	Macrophages	0.138825	0.000967814
INHBB	Mast cells	-0.0176364	0.664802		INHBB	Mast cells	0.0307633	0.466711
INHBB	Neutrophils	0.0845581	0.0374337		INHBB	Neutrophils	0.16868	5.85062e-05
INHBB	NK CD56bright cells	-0.0529021	0.193424		INHBB	NK CD56bright cells	-0.0356479	0.398963
INHBB	NK CD56dim cells	0.136535	0.000751825		INHBB	NK CD56dim cells	0.112991	0.0073348
INHBB	NK cells	0.306957	1.09158e-14		INHBB	NK cells	0.2592	4.4324e-10
INHBB	pDC	0.0929264	0.0221489		INHBB	pDC	0.103951	0.0136814
INHBB	T cells	-0.113011	0.00534981		INHBB	T cells	-0.034717	0.411399
INHBB	T helper cells	-0.0656426	0.106455		INHBB	T helper cells	-0.181447	1.50545e-05
INHBB	Tcm	0.053801	0.185953		INHBB	Tcm	-0.0194058	0.646189
INHBB	Tem	0.194357	1.43079e-06		INHBB	Tem	0.185415	9.68097e-06
INHBB	TFH	0.0588337	0.148016		INHBB	TFH	0.0773661	0.0668401
INHBB	Tgd	0.0173395	0.670108		INHBB	Tgd	0.148405	0.000415734
INHBB	Th1 cells	-0.014068	0.729632		INHBB	Th1 cells	0.0992348	0.0186183
INHBB	Th17 cells	-0.0600649	0.139702		INHBB	Th17 cells	-0.117132	0.00543261
INHBB	Th2 cells	-0.265591	3.04729e-11		INHBB	Th2 cells	-0.247956	2.54748e-09
INHBB	TReg	-0.100127	0.0136653		INHBB	TReg	-0.0547325	0.195113
NRG1	aDC	0.0837171	0.0393763		NRG1	aDC	-0.0456895	0.279566
NRG1	B cells	0.157196	0.000101948		NRG1	B cells	0.230473	3.27381e-08
NRG1	CD8 T cells	-0.0226935	0.57714		NRG1	CD8 T cells	0.00117845	0.977762
NRG1	Cytotoxic cells	-0.0199301	0.624377		NRG1	Cytotoxic cells	0.000293666	0.994458
NRG1	DC	0.205471	3.35732e-07		NRG1	DC	0.196138	2.79983e-06
NRG1	Eosinophils	0.156825	0.000105924		NRG1	Eosinophils	0.121299	0.00397915
NRG1	iDC	0.0750831	0.0647301		NRG1	iDC	0.0767848	0.0689213
NRG1	Macrophages	0.080593	0.047357		NRG1	Macrophages	-0.186911	8.17654e-06
NRG1	Mast cells	0.222346	3.17348e-08		NRG1	Mast cells	0.0795116	0.0596012
NRG1	Neutrophils	0.233885	5.65449e-09		NRG1	Neutrophils	0.0743634	0.0781687
NRG1	NK CD56bright cells	-0.139601	0.000568164		NRG1	NK CD56bright cells	0.098211	0.0198755
NRG1	NK CD56dim cells	-0.00410775	0.91962		NRG1	NK CD56dim cells	0.178533	2.06984e-05
NRG1	NK cells	-0.134026	0.000941478		NRG1	NK cells	0.157602	0.000175882
NRG1	pDC	0.10952	0.00696282		NRG1	pDC	0.284718	6.09102e-12
NRG1	T cells	0.0936088	0.0211846		NRG1	T cells	0.0159423	0.706085
NRG1	T helper cells	0.119407	0.00324071		NRG1	T helper cells	-0.218437	1.69368e-07
NRG1	Tcm	0.184224	4.99903e-06		NRG1	Tcm	-0.320093	7.42956e-15
NRG1	Tem	0.144547	0.000357345		NRG1	Tem	-0.00988474	0.815127
NRG1	TFH	0.0933311	0.0215725		NRG1	TFH	0.0341374	0.419255
NRG1	Tgd	0.169506	2.73466e-05		NRG1	Tgd	0.147967	0.000432563
NRG1	Th1 cells	0.0991961	0.0145696		NRG1	Th1 cells	-0.0948463	0.0245416
NRG1	Th17 cells	0.0814877	0.0449436		NRG1	Th17 cells	0.280157	1.35489e-11
NRG1	Th2 cells	0.0787102	0.0527918		NRG1	Th2 cells	-0.17723	2.38261e-05
NRG1	TReg	0.119163	0.00330483		NRG1	TReg	0.325252	2.58417e-15
UCN	aDC	-0.0805633	0.0474388		UCN	aDC	-0.0290138	0.492442
UCN	B cells	-0.134139	0.000932084		UCN	B cells	-0.17502	3.01775e-05
UCN	CD8 T cells	-0.0642056	0.114355		UCN	CD8 T cells	-0.0610403	0.148407
UCN	Cytotoxic cells	-0.0297761	0.464383		UCN	Cytotoxic cells	-0.084743	0.0446322
UCN	DC	-0.1162	0.0041794		UCN	DC	0.0165155	0.696033
UCN	Eosinophils	-0.0175866	0.665691		UCN	Eosinophils	-0.133215	0.00155005
UCN	iDC	-0.0492868	0.225693		UCN	iDC	-0.102057	0.0155056
UCN	Macrophages	-0.270098	1.36702e-11		UCN	Macrophages	-0.141084	0.000796618
UCN	Mast cells	-0.182334	6.26714e-06		UCN	Mast cells	-0.193244	3.94011e-06
UCN	Neutrophils	-0.150218	0.000206139		UCN	Neutrophils	-0.0359547	0.394914
UCN	NK CD56bright cells	0.214567	9.64215e-08		UCN	NK CD56bright cells	0.292365	1.54261e-12
UCN	NK CD56dim cells	0.0713169	0.0793926		UCN	NK CD56dim cells	0.0821811	0.0515124
UCN	NK cells	-0.00954849	0.814538		UCN	NK cells	0.18932	6.21121e-06
UCN	pDC	-0.00338954	0.933638		UCN	pDC	0.110446	0.00878045
UCN	T cells	-0.0968385	0.0170994		UCN	T cells	-0.130721	0.00190029
UCN	T helper cells	-0.259628	8.60064e-11		UCN	T helper cells	-0.297799	5.66807e-13
UCN	Tcm	-0.214527	9.69582e-08		UCN	Tcm	-0.173934	3.38568e-05
UCN	Tem	0.0069134	0.865137		UCN	Tem	-0.0402705	0.340623
UCN	TFH	-0.177152	1.15077e-05		UCN	TFH	-0.110571	0.00870375
UCN	Tgd	-0.305764	1.3978e-14		UCN	Tgd	-0.0957578	0.0231924
UCN	Th1 cells	-0.188531	2.96138e-06		UCN	Th1 cells	-0.0689951	0.102271
UCN	Th17 cells	0.150071	0.000209149		UCN	Th17 cells	0.16327	0.000101048
UCN	Th2 cells	-0.224454	2.33162e-08		UCN	Th2 cells	-0.16439	9.0364e-05
UCN	TReg	-0.0626567	0.123377		UCN	TReg	0.320702	6.56563e-15
MC1R	aDC	-0.110461	0.00649003		MC1R	aDC	-0.0735685	0.081415
MC1R	B cells	-0.0337937	0.4063		MC1R	B cells	-0.0870032	0.0392208
MC1R	CD8 T cells	-0.104623	0.00995872		MC1R	CD8 T cells	-0.0673807	0.110574
MC1R	Cytotoxic cells	-0.0757166	0.0624978		MC1R	Cytotoxic cells	0.0247857	0.55763
MC1R	DC	-0.0320848	0.430459		MC1R	DC	0.208361	6.25037e-07
MC1R	Eosinophils	0.148367	0.00024722		MC1R	Eosinophils	-0.0201651	0.633341
MC1R	iDC	-0.0158656	0.696696		MC1R	iDC	0.0955417	0.0235062
MC1R	Macrophages	-0.0881514	0.0300239		MC1R	Macrophages	-0.0260834	0.537185
MC1R	Mast cells	-0.0205867	0.613004		MC1R	Mast cells	0.0419312	0.321067
MC1R	Neutrophils	-0.0158928	0.696202		MC1R	Neutrophils	0.0622698	0.140388
MC1R	NK CD56bright cells	0.120203	0.00303967		MC1R	NK CD56bright cells	0.253608	1.0689e-09
MC1R	NK CD56dim cells	0.014367	0.724118		MC1R	NK CD56dim cells	0.286057	4.80382e-12
MC1R	NK cells	0.254709	1.98528e-10		MC1R	NK cells	0.420306	1.8328e-25
MC1R	pDC	0.159763	7.80955e-05		MC1R	pDC	0.298418	5.05026e-13
MC1R	T cells	-0.109369	0.0070415		MC1R	T cells	-0.0560927	0.184228
MC1R	T helper cells	-0.23535	4.51207e-09		MC1R	T helper cells	-0.397138	1.12895e-22
MC1R	Tcm	0.034636	0.394696		MC1R	Tcm	-0.356259	2.9224e-18
MC1R	Tem	0.210768	1.63452e-07		MC1R	Tem	0.148531	0.000410973
MC1R	TFH	0.0587051	0.148905		MC1R	TFH	-0.00632294	0.88111
MC1R	Tgd	-0.189038	2.78232e-06		MC1R	Tgd	0.170635	4.78249e-05
MC1R	Th1 cells	-0.0780058	0.0549547		MC1R	Th1 cells	0.0162869	0.700037
MC1R	Th17 cells	0.0409421	0.314312		MC1R	Th17 cells	0.0994022	0.0184195
MC1R	Th2 cells	-0.270119	1.36199e-11		MC1R	Th2 cells	-0.365141	3.62758e-19
MC1R	TReg	0.0403893	0.320896		MC1R	TReg	0.333682	4.40392e-16
