# Supplementary material for: Identification of a novel immune signature for optimizing prognosis and treatment prediction in colorectal cancer
Source: Aging (Albany NY). 2021 Dec 13;13(23):25518–49. doi: 10.18632/aging.203771 (PMC8714135; doi:10.18632/aging.203771)
Supplement: Supplementary Table 6 [file aging-13-203771-s005.xlsx]

## Sheet: Supplementary Table 6
Supplementary Table 6. Lists of drugs in CTRP and PRISM.
CTRP	PRISM
16-beta-bromoandrosterone	10-deacetylbaccatin
1S,3R-RSL-3	10-hydroxycamptothecin
3-Cl-AHPC	12-O-tetradecanoylphorbol-13-acetate
5-fluorouracil	1-azakenpaullone
A-804598	1-naphthyl-PP1
AA-COCF3	1-phenylbiguanide
abiraterone	2,3-DCPE
ABT-199	2-MeCCPA
ABT-737	2-methoxyestradiol
AC55649	3-amino-benzamide
afatinib	3-deazaneplanocin-A
AGK-2	3-fluorobenzylspiperone
alisertib	4-(4-fluorobenzoyl)-1-(4-phenylbutyl)-piperidine
alvocidib	4-chlorophenylguanidine
AM-580	4E1RCat
apicidin	4-hydroxy-phenazone
AT13387	4-iodo-6-phenylpyrimidine
AT-406	4-methylgenistein
AT7867	4-methylhistamine
austocystin D	4-pyrimidinecarbonitrile
avicin D	5-fluorouracil
avrainvillamide	5-hydroxymethyl-tolterodine
axitinib	7-aminocephalosporanic-acid
AZ-3146	7-hydroxystaurosporine
azacitidine	7-nitroindazole
AZD1480	8-bromo-cGMP
AZD4547	8-hydroxy-PIPAT
AZD6482	9-aminoacridine
AZD7545	A61603
AZD7762	A-674563
AZD8055	A-803467
B02	abemaciclib
bafilomycin A1	abiraterone
barasertib	abiraterone-acetate
bardoxolone methyl	ABT-702
Bax channel blocker	ABT-737
BCL-LZH-4	ABT-751
BEC	AC-264613
belinostat	ACDPP
bendamustine	acesulfame-potassium
betulinic acid	acetazolamide
bexarotene	acetophenazine
BI-2536	acetylcysteine
BIBR-1532	acetylsalicylsalicylic-acid
BIRB-796	acipimox
birinapant	acivicin
BIX-01294	ACY-1215
blebbistatin	adapalene
bleomycin A2	adaprev
BMS-195614	adarotene
BMS-270394	adefovir-dipivoxil
BMS-345541	ADL5859
BMS-536924	AEE788
BMS-754807	AEG3482
bortezomib	afatinib
bosutinib	afobazole
BRD1812	AG-14361
BRD1835	ajmaline
BRD4132	albendazole
BRD6340	alectinib
BRD8899	alexidine
BRD8958	alfacalcidol
BRD9647	alisertib
BRD9876	almorexant
BRD-A02303741	alogliptin
BRD-A05715709	alpelisib
BRD-A71883111	altretamine
BRD-A86708339	alvespimycin
BRD-A94377914	alvocidib
BRD-K01737880	AM-251
BRD-K02251932	AM-404
BRD-K02492147	AM-580
BRD-K04800985	ambazone
BRD-K09344309	amfenac
BRD-K09587429	AMG-208
BRD-K11533227	AMG-232
BRD-K13999467	AMG458
BRD-K14844214	AMG900
BRD-K16147474	aminoglutethimide
BRD-K17060750	aminopurvalanol-a
BRD-K19103580	amisulpride
BRD-K24690302	ammonium-lactate
BRD-K26531177	amonafide
BRD-K27224038	amoxicillin
BRD-K27986637	amprolium
BRD-K28456706	amsacrine
BRD-K29086754	anagrelide
BRD-K29313308	anastrozole
BRD-K30019337	anguidine
BRD-K30748066	anisomycin
BRD-K33199242	AP1903
BRD-K33514849	AP26113
BRD-K34099515	apatinib
BRD-K34222889	aphidicolin
BRD-K34485477	AR-12
BRD-K35604418	AR-42
BRD-K37390332	arctigenin
BRD-K41334119	arcyriaflavin-a
BRD-K41597374	aripiprazole
BRD-K42260513	ARRY-334543
BRD-K44224150	artemisinin
BRD-K45681478	artesunate
BRD-K48334597	AS-1949490
BRD-K48477130	AS-703026
BRD-K49290616	aspirin
BRD-K50799972	AST-1306
BRD-K51490254	astemizole
BRD-K51831558	asymmetrical-dimethylarginine
BRD-K52037352	AT13387
BRD-K55116708	AT-7519
BRD-K61166597	AT7867
BRD-K63431240	AT-9283
BRD-K64610608	atenolol-(-)
BRD-K66453893	atenolol-(+/-)
BRD-K66532283	atipamezole
BRD-K70511574	atiprimod
BRD-K71781559	atorvastatin
BRD-K71935468	aurora-a-inhibitor-i
BRD-K75293299	AV-412
BRD-K78574327	avanafil
BRD-K80183349	AVL-292
BRD-K84807411	AVN-944
BRD-K85133207	axitinib
BRD-K86535717	AZ20
BRD-K88742110	AZ3146
BRD-K90370028	AZ-628
BRD-K92856060	AZ960
BRD-K94991378	azacitidine
BRD-K96431673	azalomycin-b
BRD-K96970199	azathioprine
BRD-K97651142	AZD1480
BRD-K99006945	AZD2014
BRD-M00053801	AZD2461
brefeldin A	AZD2858
brivanib	AZD3463
BYL-719	AZD4547
C6-ceramide	AZD5363
cabozantinib	AZD5438
canertinib	AZD6482
CAY10576	AZD7762
CAY10594	AZD8055
CAY10618	AZD8330
CBB-1007	AZD8931
CCT036477	AZD9668
CD-1530	azilsartan
CD-437	azithromycin
cediranib	azodicarbonamide
ceranib-2	azomycin-(2-nitroimidazole)
cerulenin	aztreonam
Ch-55	bafetinib
CHIR-99021	baicalein
chlorambucil	baicalin
CHM-1	balapiravir
CI-976	BAM7
ciclopirox	BAN-ORL-24
ciclosporin	barasertib
CID-5951923	barasertib-HQPA
CIL41	bardoxolone
CIL55	bardoxolone-methyl
CIL55A	baricitinib
CIL56	batimastat
CIL70	BAY-11-7082
cimetidine	BAY-11-7085
clofarabine	BAY-87-2243
COL-3	BAY-K-8644-(s)-(-)
Compound 1541A	beclomethasone-dipropionate
compound 1B	bekanamycin
Compound 23 citrate	belinostat
Compound 7d-cis	bendamustine
CR-1-31B	bendroflumethiazide
crizotinib	benfotiamine
cucurbitacin I	bentazepam
curcumin	benzethonium
cyanoquinoline 11	benzocaine
cyclophosphamide	benzydamine
cytarabine hydrochloride	benzyldimethylhexadecylammonium
cytochalasin B	bephenium-hydroxynaphthoate
dabrafenib	berberine
dacarbazine	beta-lapachone
darinaparsin	betamethasone
dasatinib	betamethasone-dipropionate
DBeQ	beta-naphthol
decitabine	betulinic-acid
dexamethasone	bexarotene
dinaciclib	BF2.649
docetaxel	BGT226
doxorubicin	BI-2536
ELCPK	BI-78D3
elocalcitol	BIBR-1532
entinostat	BIBU-1361
epigallocatechin-3-monogallate	BIBX-1382
erastin	bicalutamide
erismodegib	BI-D1870
erlotinib	bifemelane
etomoxir	BIIB021
etoposide	bindarit
ETP-46464	birinapant
EX-527	bis(maltolato)oxovanadium(IV)
FGIN-1-27	bisacodyl
fingolimod	bisindolylmaleimide-ix
FK-866	bitopertin
fluvastatin	BIX-01294
foretinib	BIX-02188
FQI-1	blebbistatin-(-)
FQI-2	BMS-265246
FSC231	BMS-345541
fulvestrant	BMS-387032
fumonisin B1	BMS-599626
GANT-61	BMS-626529
GDC-0879	BMS-690514
GDC-0941	BMS-707035
gefitinib	BMS-754807
gemcitabine	BMS-986020
GMX-1778	BNC105
gossypol	BNTX
GSK1059615	bortezomib
GSK2636771	bosentan
GSK-3 inhibitor IX	bosutinib
GSK4112	brefeldin-a
GSK461364	brequinar
GSK-J4	brigatinib
GW-405833	brilliant-green
GW-843682X	brivaracetam
HBX-41108	bromosporine
HC-067047	broxaldine
HLI 373	broxyquinoline
hyperforin	bruceantin
I-BET151	BTS-54505
I-BET-762	bucladesine
ibrutinib	bumetanide
IC-87114	buparlisib
idelalisib	buphenine
ifosfamide	busulfan
imatinib	butamben
importazole	buthionine-sulfoximine
indisulam	butylscopolamine-bromide
IPR-456	BVD-523
isoevodiamine	BVT-948
isoliquiritigenin	BW-180C
isonicotinohydroxamic acid	BX-912
ISOX	cabazitaxel
istradefylline	cabozantinib
itraconazole	caffeic-acid
IU1	caffeic-acid-phenethyl-ester
JQ-1	calcitriol
JW-480	camptothecin
JW-55	camylofine-chlorhydrate
JW-74	candesartan
KH-CB19	canertinib
KHS101	canrenone
Ki8751	capecitabine
Ko-143	capsaicin
KPT185	captamine
KU 0060648	carbachol
KU-0063794	carboplatin
KU-55933	carboxyamidotriazole
KU-60019	carboxypyridine-disulfide
KW-2449	carfilzomib
KX2-391	cariporide
L-685458	carmofur
lapatinib	carmustine
LBH-589	carvedilol
LE-135	CB-10-277
lenvatinib	CCG-50014
leptomycin B	CCMI
linifanib	CCT128930
linsitinib	CCT129202
lomeguatrib	CCT137690
lovastatin	CD-437
LRRK2-IN-1	cebranopadol
LY-2157299	cediranib
LY-2183240	cefdinir
manumycin A	cefditoren-pivoxil
marinopyrrole A	cefpiramide
masitinib	CEP-32496
Mdivi-1	CEP-33779
Merck60	CEP-37440
methotrexate	cephalomannine
methylstat	cetrimonium
MG-132	cetylpyridinium
MGCD-265	CGM097
MI-1	CGP-37849
MI-2	CGP-52411
mitomycin-c	CGP-54626
MK-0752	CGS-15943
MK-1775	CGS-20625
MK-2206	CH5132799
ML006	chicago-sky-blue-6b
ML029	chidamide
ML031	CHIR-124
ML050	CHIR-98014
ML083	CHIR-99021
ML162	chlorambucil
ML203	chloramphenicol-palmitate
ML210	chlorhexidine
ML239	chlorindanol
ML258	chlormidazole
ML311	chlorogenic-acid
ML312	chloropyramine
ML320	chloroxine
ML334 diastereomer	chlorpropamide
MLN2238	chlorpyrifos
MLN2480	chlorquinaldol
momelotinib	cholecalciferol
MST-312	chromocarb
myricetin	CI-844
myriocin	cibenzoline
N9-isopropylolomoucine	ciclesonide
nakiterpiosin	ciclopirox
narciclasine	CID-5458317
navitoclax	cidofovir
necrostatin-1	cilostamide
necrostatin-7	cimetidine
necrosulfonamide	cinacalcet
nelarabine	cinalukast
neopeltolide	cinnarazine
neratinib	cinromide
neuronal differentiation inducer III	ciprofibrate
niclosamide	cisplatin
nilotinib	CL-218872
nintedanib	cladribine
NPC-26	clebopride
NSC 74859	clenbuterol
NSC19630	clindamycin-phosphate
NSC23766	clobetasol-propionate
NSC30930	clobutinol
NSC48300	clocortolone-pivalate
NSC632839	clofarabine
NSC95397	clofazimine
nutlin-3	clofibrate
NVP-231	clofoctol
NVP-ADW742	clomifene
NVP-BEZ235	clonazepam
NVP-BSK805	clopamide
NVP-TAE684	clotrimazole
O-6-benzylguanine	CMPD-1
obatoclax	CNX-2006
olaparib	CNX-774
oligomycin A	cobicistat
omacetaxine mepesuccinate	cobimetinib
OSI-027	colchicine
OSI-930	colforsin-daproate
ouabain	colfosceril-palmitate
PAC-1	colistin-b-sulfate
paclitaxel	combretastatin-A-4
palmostatin B	costunolide
pandacostat	CP-673451
parbendazole	CP-724714
parthenolide	CP-945,598
pazopanib	CPI-1189
PD 153035	CPP
PD318088	CR8-(R)
PDMP	creatine
pevonedistat	crenolanib
PF-184	crizotinib
PF-3758309	crizotinib-(S)
PF-4800567 hydrochloride	cromakalim
PF-543	crystal-violet
PF-573228	CS-110266
PF-750	CUDC-101
PHA-793887	CUDC-907
phloretin	curcumin
PI-103	CX-4945
pifithrin-alpha	CX-5461
pifithrin-mu	CYC116
PIK-93	cyclocytidine
piperlongumine	cycloheximide
pitstop2	cyclophosphamide
PL-DI	cyclosporin-a
pluripotin	cyclosporine
PLX-4032	cyclovalone
PLX-4720	cyclovirobuxin-d
PRIMA-1	cyproheptadine
PRIMA-1-Met	cyproterone-acetate
PRL-3 inhibitor I	cyromazine
procarbazine	cyt387
prochlorperazine	CYT-997
purmorphamine	cytarabine
PX-12	cytochalasin-b
PYR-41	cytochlor
pyrazolanthrone	D-4476
QS-11	D-64131
quizartinib	D-7193
QW-BI-011	dabrafenib
R428	dacarbazine
RAF265	dacinostat
regorafenib	daclatasvir
Repligen 136	dacomitinib
RG-108	dalcetrapib
rigosertib	danazol
RITA	danusertib
RO4929097	dapivirine
ruxolitinib	darapladib
salermide	darifenacin
saracatinib	dasatinib
SB-225002	daunorubicin
SB-431542	DCEBIO
SB-525334	decitabine
SB-743921	defactinib
SCH-529074	deferasirox
SCH-79797	deflazacort
selumetinib	deforolimus
semagacestat	dehydrocholate-acid
serdemetan	delanzomib
SGX-523	demecarium
SID 26681509	deoxycorticosterone-acetate
sildenafil	dequalinium
silmitasertib	desonide
simvastatin	desoxycortone
sirolimus	dexamethasone-acetate
sitagliptin	dexrazoxane
SJ-172550	dianhydrogalactitol
skepinone-L	diaveridine
SKI-II	diazooxonorleucine
SMER-3	dichlorisone-acetate
SN-38	dichloroacetate
SNS-032	dichlorvos
SNX-2112	diclazuril
sorafenib	dicycloverine
sotrastaurin	dienogest
spautin-1	difluprednate
SR1001	digitoxigenin
SR8278	digitoxin
SR-II-138A	digoxigenin
SRT-1720	digoxin
staurosporine	dihydroartemisinin
StemRegenin 1	dihydroergocristine
STF-31	dihydromyricetin
SU11274	dimethisoquin
sunitinib	dinaciclib
SZ4TA2	dioscin
tacedinaline	diphemanil
tacrolimus	diphenyleneiodonium
tamatinib	dirithromycin
tamoxifen	disulfiram
tandutinib	DMH1
tanespimycin	docetaxel
temozolomide	dofetilide
temsirolimus	dolastatin-10
teniposide	dolutegravir
TG-100-115	domiphen
TG-101348	domperidone
TGX-221	dorzolamide
thalidomide	dovitinib
tigecycline	doxercalciferol
tipifarnib	doxifluridine
tipifarnib-P2	doxorubicin
tivantinib	doxycycline
tivozanib	DPI-201106
topotecan	dronedarone
tosedostat	drospirenone
tozasertib	D-Serine
TPCA-1	DU-728
trametinib	DVD-111
tretinoin	E7449
triazolothiadiazine	ebastine
trifluoperazine	ecamsule-triethanolamine
triptolide	echinomycin
tubastatin A	efonidipine-monoethanolate
TW-37	elacridar
UNC0321	elesclomol
UNC0638	eltrombopag
VAF-347	embelin
valdecoxib	EMD-53998
vandetanib	emetine
veliparib	endo-IWR-1
VER-155008	ENMD-2076
vincristine	enocitabine
vorapaxar	enoximone
vorinostat	entinostat
VU0155056	enzalutamide
WAY-362450	epiandrosterone
WP1130	epinastine
WZ4002	epinephrine
WZ8040	epirubicin
XL765	eplerenone
YK 4-279	epothilone-a
YM-155	epothilone-b
zebularine	epothilone-d
ZSTK-474	eprinomectin
	eprobemide
	eprosartan
	eptifibatide
	EPZ-5676
	equol
	ER-27319
	erastin
	ercalcitriol
	erdafitinib
	erlotinib
	erteberel
	erythritol
	estradiol
	estradiol-benzoate
	estradiol-cypionate
	estramustine
	estramustine-phosphate
	estrone
	ethacridine-lactate-monohydrate
	ethinyl-estradiol
	etofylline-clofibrate
	etomoxir
	etoposide
	etoposide-phosphate
	ETP-46464
	evacetrapib
	everolimus
	evodiamine
	EVP4593
	exatecan-mesylate
	exemestane
	famciclovir
	famotidine
	favipiravir
	fdcyd
	felbamate
	fenaclon
	fenbendazole
	fendiline
	fenofibrate
	fenoprofen
	fenretinide
	FERb-033
	fexinidazole
	FG-4592
	filanesib
	filgotinib
	finafloxacin
	FK-3311
	FK-866
	FK-888
	fleroxacin
	FLI-06
	florfenicol
	floxuridine
	flubendazole
	fludarabine
	fludarabine-phosphate
	fludroxycortide
	flufenamic-acid
	flumatinib
	flumethasone
	flumethasone-pivalate
	fluocinolone-acetonide
	fluorometholone
	fluoromethylcholine
	fluroxene
	flutamide
	fluticasone-propionate
	fluvastatin
	foretinib
	formestane
	forodesine
	forskolin
	fosbretabulin
	foscarnet
	FPH1-(BRD-6125)
	FR-122047
	FR-139317
	frentizole
	ftorafur
	fudosteine
	fulvestrant
	G-1
	galeterone
	gambogic-acid
	gamma-aminobutyric-acid
	ganetespib
	gastrodin
	GDC-0068
	GDC-0152
	GDC-0349
	GDC-0879
	GDC-0941
	GDC-0980
	gefitinib
	gemcitabine
	genipin
	genz-644282
	gestrinone
	GGTI-298
	gidazepam
	gilteritinib
	gimeracil
	ginkgolide-a
	givinostat
	golgicide-a
	golvatinib
	gossypol
	GS-39783
	GS-9973
	GSK1070916
	GSK1292263
	GSK1838705A
	GSK1904529A
	GSK2110183
	GSK2126458
	GSK256066
	GSK2656157
	GSK2830371
	GSK-3-inhibitor-IX
	GSK429286A
	GSK461364
	GSK650394
	GSK923295
	GSK-J4
	GTP-14564
	guanidine
	GW-3965
	GW-405833
	GW-441756
	GW-501516
	GW-583340
	GW-788388
	GW-842166
	GW-843682X
	GZD824
	HA14-1
	halcinonide
	halobetasol-propionate
	halofantrine
	halofuginone
	harringtonine
	hesperadin
	hexachlorophene
	hexaminolevulinate
	hexylresorcinol
	HMN-214
	homoharringtonine
	homoquinolinic-acid
	homosalate
	hydrocortisone
	hydroxytacrine-maleate-(r,s)
	hydroxyurea
	hyodeoxycholic-acid
	hyoscyamine
	hypericin
	hypoestoxide
	I-BET151
	I-BET-762
	ibrutinib
	ibutilide
	ICG-001
	ICI-162846
	icotinib
	idarubicin
	idasanutlin
	idazoxan
	idelalisib
	idoxuridine
	IDRA-21
	idronoxil
	IEM1754
	ifosfamide
	IKK-16
	IKK-2-inhibitor-V
	ilomastat
	imatinib
	imidapril
	imiloxan
	imiquimod
	INC-280
	indibulin
	indiplon
	indirubin
	indisulam
	indoprofen
	ingenol-mebutate
	INH1
	inosine
	iobenguane
	iodipamide
	iododexetimide
	IOWH032
	iproniazid
	ipsapirone
	irinotecan
	isoetharine
	isofloxythepin
	isoflupredone-acetate
	isometheptene-mucate
	isopropyl-myristate
	isoxsuprine
	ispinesib
	istradefylline
	itraconazole
	ivermectin
	ixabepilone
	ixazomib
	ixazomib-citrate
	JIB04
	JK-184
	JNJ-16259685
	JNJ-26481585
	JNJ-7706621
	josamycin
	JQ1
	JTC-801
	JTE-607
	JZL-184
	K-858
	KD-023
	KD025
	kenpaullone
	ketoconazole
	ketoprofen
	KF-38789
	KI-16425
	KI-8751
	kifunensine
	KP-1212
	KPT-185
	KPT-276
	K-Ras(G12C)-inhibitor-6
	k-strophanthidin
	ku-0063794
	KW-2449
	KW-2478
	KX2-391
	KY02111
	kynurenic-acid
	L-798,106
	lacitol
	lafutidine
	lanatoside-c
	lanoconazole
	lapatinib
	lappaconite
	lasalocid
	latanoprost
	latrepirdine
	LB42708
	LCL-161
	LDN-212854
	LDN-57444
	LE-135
	lenalidomide
	lenvatinib
	lerisetron
	lestaurtinib
	letrozole
	leucovorin
	levobunolol
	levocarnitine
	levocetirizine
	levonorgestrel
	LGX818
	licochalcone-a
	lidamidine
	lidocaine
	linalool
	linifanib
	linsitinib
	litronesib
	lomefloxacin
	lomitapide
	lonafarnib
	lorazepam
	lorlatinib
	lovastatin
	loxistatin-acid
	lucitanib
	lurasidone
	LY2090314
	LY2109761
	LY2183240
	LY2334737
	LY2603618
	LY2606368
	LY2608204
	LY2784544
	LY2801653
	LY2874455
	LY3023414
	LY303511
	LY364947
	LY456236
	M-344
	maprotiline
	marimastat
	masitinib
	maxacalcitol
	maytansinol-isobutyrate
	mebendazole
	mechlorethamine
	meclizine
	mefexamide
	meglitinide
	MEK1-2-inhibitor
	MEK162
	melengestrol-acetate
	meloxicam
	melphalan
	menadione
	mephenytoin
	mepivacaine
	mercaptopurine
	mericitabine
	merimepodib
	mesna
	mesoridazine
	metaraminol
	metatinib
	methacycline
	methiazole
	methocarbamol
	methotrexate
	methoxyflurane
	methscopolamine
	methyldopa
	methylphenidate
	methylprednisolone
	metoprolol
	metoxibutropate
	metronidazole
	metyrapone
	mevastatin
	mexeneone
	mexiletine
	MG-132
	MGCD-265
	mibampator
	mibefradil
	midodrine
	midostaurin
	mifepristone
	minocycline
	mitomycin-c
	mitoxantrone
	MK-0773
	MK-0812
	MK-1775
	MK-2206
	MK-2461
	MK-3207
	MK-5108
	MK-8245
	MK-8745
	ML133
	MLN0128
	MLN-8054
	MNS-(3,4-Methylenedioxy-nitrostyrene)
	mocetinostat
	monensin
	monobenzone
	morin
	motesanib
	mozavaptan
	MPI-0479605
	MRS-1220
	MTPG
	mubritinib
	mycophenolate-mofetil
	mycophenolic-acid
	N-acetylmannosamine
	nadide
	nadifloxacin
	nafcillin
	naftidrofuryl
	naftifine
	naloxone
	naltrexone
	NAN-190
	nanchangmycin
	napabucasin
	naproxen
	narasin
	narlaprevir
	navarixin
	navitoclax
	nefiracetam
	nelarabine
	nemonapride
	nemorubicin
	neratinib
	nexturastat-a
	NH125
	niacin
	niclosamide
	nicorandil
	nicotine
	nilotinib
	nilutamide
	nimorazole
	nintedanib
	niraparib
	niridazole
	nisoxetine
	nitarsone
	nithiamide
	nitisinone
	nitrocaramiphen
	nizatidine
	nizofenone
	NMS-1286937
	NMS-873
	NMS-E973
	nobiletin
	nocodazole
	nomegestrol-acetate
	nonoxynol-9
	norepinephrine
	norethindrone
	norethindrone-acetate
	noretynodrel
	norfloxacin
	norgestrel
	novobiocin
	NSC-23766
	NSC-319726
	NSC-3852
	NSC-632839
	NSC-663284
	NSC-697923
	NU6027
	nutlin-3
	NVP-AEW541
	NVP-AUY922
	NVP-BEZ235
	NVP-BHG712
	NVP-BVU972
	NVP-TAE226
	NVP-TAE684
	obatoclax
	obidoxime
	octenidine
	octopamine
	odanacatib
	olaparib
	OLDA
	oleanolic-acid
	oleoylethanolamide
	oligomycin-a
	oltipraz
	omeprazole
	ONC201
	oncrasin-1
	ONX-0914
	oprozomib
	orantinib
	oridonin
	ornithine
	orotic-acid
	oseltamivir-phosphate
	OSI-027
	OSI-420
	OSI-930
	osimertinib
	OTS167
	OTX015
	ouabain
	oxaliplatin
	oxazepam
	oxcarbazepine
	oxibendazole
	oxiperomide
	oxiracetam
	oxonic-acid
	oxprenolol
	oxymatrine
	oxymetazoline
	oxyphencyclimine
	oxyquinoline
	P22077
	P276-00
	P5091
	PAC-1
	paclitaxel
	pacritinib
	palbociclib
	paliperidone
	palmatine-chloride
	palmitoylethanolamide
	palomid-529
	panobinostat
	papaverine
	parachlorophenol
	parbendazole
	pardoprunox
	paricalcitol
	parthenolide
	parthenolide-(-)
	pazopanib
	PCI-24781
	PD-0325901
	PD-153035
	PD-168393
	PD-173074
	PD-184352
	PD-198306
	PD-318088
	PD-407824
	PD-98059
	pelitinib
	penfluridol
	penicillamine-(D)
	pentagastrin
	pentamidine
	pentostatin
	pepstatin
	peruvoside
	PETCM
	pevonedistat
	PF-03758309
	PF-03814735
	PF-04136309
	PF-04217903
	PF-04457845
	PF-04691502
	PF-05212384
	PF-3845
	PF-477736
	PF-4981517
	PF-562271
	PF-573228
	PFI-1
	PFK-015
	PHA-665752
	PHA-680632
	PHA-767491
	PHA-793887
	PHA-848125
	phenazone
	phenelzine
	pheniramine
	phenylbutazone
	phenylmercuric-acetate
	phlorizin
	PI-103
	PI3K-IN-2
	PI-828
	pibenzimol
	picolinic-acid
	PIK-75
	pilaralisib
	pilocarpine
	pindolol
	piperacetazine
	piperazine
	piperine
	pirenperone
	piretanide
	piroxicam
	pitavastatin
	PJ-34
	PKI-179
	plinabulin
	PLX-4720
	podophyllotoxin
	polydatin
	pomalidomide
	ponatinib
	posaconazole
	poziotinib
	PP-1
	PP-121
	PP-2
	PP242
	PPT
	PQ-401
	PR-619
	practolol
	pralatrexate
	pranidipine
	prazosin
	prednisolone
	prednisolone-acetate
	prednisolone-hemisuccinate
	prednisolone-tebutate
	primaquine
	proflavine-hemisulfate
	propoxycaine
	propranolol
	proscillaridin-a
	protirelin
	PRT062070
	PRT062607
	PSB-1115
	PSI-7976
	PTC-209
	pterostilbene
	PU-H71
	puromycin
	pyrimethamine
	pyrithione-zinc
	pyritinol
	pyroxamide
	quinethazone
	quinidine
	quizartinib
	R306465
	R406
	R547
	rabeprazole
	racecadotril
	raclopride
	radezolid
	RAF265
	raloxifene
	raltitrexed
	ramatroban
	ramifenazone
	ranitidine
	refametinib
	regorafenib
	remoxipride
	repaglinide
	repsox
	resatorvid
	resiquimod
	resminostat
	RG108
	RG2833
	RGFP966
	rheochrysidin
	RI-1
	ribavirin
	ribitol
	ribociclib
	riboflavin
	rifampin
	rigosertib
	riluzole
	rimexolone
	riociguat
	RITA
	ritodrine
	RKI-1447
	RN-1734
	Ro-04-5595
	Ro-10-5824
	Ro-106-9920
	Ro-4987655
	Ro-90-7501
	Ro-9187
	rociletinib
	romidepsin
	roquinimex
	RS-16566
	RS-17053
	RS-504393
	RS-67506
	RU-58841
	rubitecan
	rucinol
	rutin
	ruxolitinib
	ryuvidine
	S26948
	salidroside
	salinomycin
	salvianolic-acid-B
	salvinorin-a
	sangivamycin
	SAR131675
	saracatinib
	sarafloxacin
	satraplatin
	saxagliptin
	SB-200646
	SB-205384
	SB-216641
	SB-218078
	SB-218795
	SB-225002
	SB-228357
	SB-2343
	SB-239063
	SB-242235
	SB-366791
	SB-431542
	SB-505124
	SB-525334
	SB-590885
	SB-657510
	SB-743921
	SB-939
	SC-12267
	SC-144
	SCH-58261
	SCH-900776
	sclareol
	scriptaid
	SCS
	SDZ-WAG-994
	secnidazole
	securinine
	selamectin
	selinexor
	selumetinib
	semaxanib
	se-methylselenocysteine
	serdemetan
	sertindole
	sevelamer
	sevoflurane
	SGI-1027
	SGI-1776
	SIB-1757
	SID-7969543
	simvastatin
	sirolimus
	skepinone-l
	SKF-96365
	SKI-II
	S-methylcysteine
	SMI-4a
	SN-38
	SNS-314
	SNX-2112
	SNX-5422
	sobetirome
	sodium-glucoheptonate
	sodium-stibogluconate
	sodium-tanshinone-ii-a-sulfonate
	sonidegib
	sorafenib
	sparfloxacin
	spermidine
	spermine
	spiradoline
	spironolactone
	SR-27897
	SR-33805
	SR-57227A
	SRT1720
	STA-5326
	stattic
	stemregenin-1
	STF-118804
	streptozotocin
	SU014813
	SU3327
	sufentanil
	sulconazole
	sulfabenzamide
	sulfamethazine
	sulfanilamide
	sulfasalazine
	sulmazole
	sunitinib
	suxibuzone
	tacalcitol
	tacedinaline
	tacrolimus
	tagatose
	TAK-285
	TAK-632
	TAK-715
	TAK-733
	TAK-901
	talazoparib
	talmapimod
	taltirelin
	taltobulin
	TAME
	tamibarotene
	tamoxifen
	tanaproget
	tandutinib
	tanespimycin
	tanshinone-i
	TAS-103
	taselisib
	tasisulam
	taurine
	tazemetostat
	TC1
	tecastemizole
	tedizolid
	tedizolid-phosphate
	telatinib
	telotristat-ethyl
	temazepam
	temocapril
	temoporfin
	temozolomide
	temsirolimus
	teniposide
	tenovin-6
	tepoxalin
	teprenone
	terbutaline
	terconazole
	terfenadine
	teriflunomide
	teroxirone
	tetrahydropapaverine
	tetrahydrouridine
	tetramethylthiuram-monosulfide
	tetrandrine
	tezacaftor
	TG-02
	TG100-115
	TG-100572
	TG-100713
	TG-101209
	TG-101348
	TH-302
	theophylline
	thiamine
	thiocolchicoside
	thioguanine
	thiomersal
	thioproperazine
	thiostrepton
	thiram
	thonzonium
	tiagabine
	tideglusib
	tiletamine
	tilmicosin
	tiludronate
	tioguanine
	tiotidine
	tioxolone
	tipifarnib
	tipiracil
	tipranavir
	tirapazamine
	tivantinib
	tivozanib
	TMC-353121
	TMS
	tofogliflozin
	topotecan
	torasemide
	torcetrapib
	toremifene
	torin-1
	torin-2
	tosedostat
	tozasertib
	TPCA-1
	trametinib
	tranilast
	trans-4-Hydroxycrotonic-acid
	trapidil
	tremorine
	trequinsin
	triamcinolone
	triamcinolone-acetonide
	triamterene
	triapine
	trichostatin-a
	triciribine
	triclabendazole
	trifluridine
	trimebutine
	triptolide
	trolox
	trometamol
	tropisetron
	trovafloxacin
	tryptanthrin
	TU-2100
	tucatinib
	TW-37
	TWS-119
	tyloxapol
	tyrphostin-A9
	tyrphostin-AG-1296
	tyrphostin-AG-1478
	tyrphostin-AG-494
	tyrphostin-AG-99
	U-0126
	U-18666A
	ubenimex
	UH-232-(+)
	UK-383367
	ulipristal
	UNBS-5162
	UNC0631
	UNC2250
	uprosertib
	uracil
	uric-acid
	uridine
	usniacin-(+)
	valnemulin
	valrubicin
	vandetanib
	vanoxerine
	vatalanib
	VE-821
	VE-822
	vemurafenib
	venetoclax
	VER-49009
	verubulin
	vidarabine
	vinblastine
	vincamine
	vincristine
	vindesine
	vinflunine
	vinorelbine
	vismodegib
	VLX600
	volasertib
	voreloxin
	vorinostat
	voxtalisib
	VS-4718
	VTP-27999
	VU0238429
	VU0361737
	VU0364770
	VX-702
	VX-765
	warfarin
	WAY-170523
	WAY-600
	WHI-P154
	WP1066
	WP1130
	WYE-125132
	WYE-354
	WZ-3146
	WZ-4002
	WZ8040
	xanomeline
	XBD173
	xilobam
	XL388
	XL-647
	XL888
	xylazine
	Y-27632
	Y-320
	Y-39983
	YM-155
	YM-201636
	YM-976
	YO-01027
	zaldaride
	zaleplon
	zardaverine
	ziprasidone
	ZK811752
	ZK-93423
	ZK-93426
	ZLN005
	ZM-306416
	ZM-447439
	zolantidine
	zolmitriptan
	ZSTK-474
